The infant gut microbiome and rotavirus vaccine immunogenicity in rural  
Zimbabwean infants

1 **The gut microbiome and rotavirus vaccine immunogenicity in rural**  
2 **Zimbabwean infants**

3  
4

5 Ruairi C. Robertson<sup>a</sup>, James A. Church<sup>a,b</sup>, Thaddeus J. Edens<sup>c</sup>, Kuda Mutasa<sup>b</sup>, Hyun  
6 Min Geum<sup>d</sup>, Iman Baharmand<sup>d</sup>, Sandeep K. Gill<sup>d,e</sup>, Robert Ntozini<sup>b</sup>, Bernard  
7 Chasekwa<sup>b</sup>, Lynnea Carr<sup>d,f</sup>, Florence D. Majo<sup>b</sup>, Beth D. Kirkpatrick<sup>g</sup>, Benjamin Lee<sup>g</sup>,  
8 Lawrence H. Moulton<sup>h</sup>, Jean H. Humphrey<sup>b,h</sup>, Andrew J. Prendergast<sup>a,b,h\*</sup>, Ameer R.  
9 Manges<sup>d,e,\*</sup> and the SHINE Trial Team<sup>i</sup>

10  
11

12 <sup>a</sup>Centre for Genomics and Child Health, Blizard Institute, Queen Mary University of London, London,  
13 UK

14 <sup>b</sup>Zvitambo Institute for Maternal and Child Health Research, Harare, Zimbabwe

15 <sup>c</sup>Devil's Staircase Consulting, West Vancouver, British Columbia, Canada

16 <sup>d</sup>British Columbia Centre for Disease Control, Vancouver, British Columbia, Canada

17 <sup>e</sup>School of Population and Public Health, University of British Columbia, Vancouver, Canada

18 <sup>f</sup>Department of Microbiology and Immunology, University of British Columbia, Canada

19 <sup>g</sup>Vaccine Testing Center, College of Medicine, University of Vermont, Burlington, Vermont

20 <sup>h</sup>Department of International Health, Johns Hopkins Bloomberg School of Public Health, Baltimore, MD,  
21 USA

22 <sup>i</sup>Members of the SHINE Trial team who are not named authors are listed in  
23 [https://academic.oup.com/cid/article/61/suppl\\_7/S685/358186](https://academic.oup.com/cid/article/61/suppl_7/S685/358186)

24 \*Co-senior authors

25  
26

27 **Corresponding author:** Ruairi C. Robertson, Centre for Genomics & Child Health, Blizard Institute, 4  
28 Newark Street, London E1 2AT, United Kingdom. E-mail: r.robertson@qmul.ac.uk.

29  
30  
31  
32  
33  
34

# The infant gut microbiome and rotavirus vaccine immunogenicity in rural Zimbabwean infants

## 35 **ABSTRACT**

36

37 *Background:* Oral rotavirus vaccine (RVV) immunogenicity is considerably lower in low- versus  
38 high-income populations; however, the mechanisms underlying this remain unclear. Previous  
39 evidence suggests that the gut microbiota may contribute to differences in oral vaccine  
40 efficacy.

41

42 *Methods:* We performed whole metagenome shotgun sequencing on stool samples and  
43 measured anti-rotavirus immunoglobulin A in plasma samples from a subset of infants enrolled  
44 in a cluster randomized 2×2 factorial trial of improved water, sanitation and hygiene and infant  
45 feeding in rural Zimbabwe (SHINE trial: NCT01824940). We examined taxonomic and  
46 functional microbiome composition using random forest models, differential abundance testing  
47 and regression analyses to explore associations with RVV immunogenicity.

48

49 *Results:* Among 158 infants with stool samples and anti-rotavirus IgA titres, 34 were RVV  
50 seroconverters. The median age at stool collection was 43 days. The infant microbiome was  
51 dominated by *Bifidobacterium longum*. The gut microbiome differed significantly between early  
52 ( $\leq 42$  days) and later samples ( $> 42$  days) however, we observed no meaningful differences in  
53 alpha diversity, beta diversity, species composition or functional metagenomic composition by  
54 RVV seroconversion status. *Bacteroides thetaiotaomicron* was the only species associated  
55 with anti-rotavirus IgA titre. Random forest models poorly classified seroconversion status by  
56 both composition and functional microbiome variables.

57

58 *Conclusions:* RVV immunogenicity is low in this rural Zimbabwean setting, however it is not  
59 explained by the composition or function of the early-life gut microbiome. Further research is  
60 warranted to examine the mechanisms of poor oral RVV efficacy in low-income countries.

61

62 **Key words:** microbiota, microbiome, rotavirus, shotgun metagenomics, oral rotavirus vaccine

63 **INTRODUCTION**

64 Rotavirus is the leading cause of diarrheal morbidity and mortality in children [1].  
65 Although several oral rotavirus vaccines (RVV) are currently available globally, their  
66 efficacy varies substantially by population, limiting their impact [2]. Large efficacy  
67 studies show RVV efficacy of 85-98% against severe rotavirus gastroenteritis in high-  
68 income settings [3, 4], compared to only 48% and 39% in South Asia [5] and sub-  
69 Saharan Africa [6] respectively. The reasons for poor oral vaccine efficacy in low-  
70 income populations remain poorly understood, however intestinal factors may  
71 contribute [7-9].

72 The gut microbiota plays a critical role in the maturation of early-life immune  
73 function and intestinal development [10]. The composition of the early-life gut  
74 microbiota may also influence susceptibility to viral infections, since antibiotic  
75 treatment and segmented filamentous bacteria both reduce the pathogenicity of  
76 rotavirus in mice [11, 12]. Emerging evidence suggests that the early-life gut  
77 microbiota influences oral vaccine responses by modulating the immune and  
78 metabolic environments of the intestine [13]. In mice, antibiotic treatment impairs  
79 vaccine responses, an effect that is reversed following restoration of the microbiota  
80 [14]. In adults, narrow-spectrum antibiotics did not alter absolute anti-RV IgA titres  
81 following RVV, but did lead to a higher proportion of individuals displaying short-term  
82 IgA “boosting” (defined as a  $\geq 2$ -fold rise in anti-RV titre 7 days post-vaccination)  
83 compared with placebo or broad-spectrum antibiotics [15]. Observational evidence  
84 from children in low-income settings has shown no consistent association between the  
85 gut microbiota and RVV efficacy in India [16], while RVV immunogenicity was  
86 associated with gut microbiota composition in cohorts in Pakistan [17] and Ghana [18].

## The infant gut microbiome and rotavirus vaccine immunogenicity in rural Zimbabwean infants

87 In these settings, RVV seroconverters compared to non-seroconverters displayed a  
88 gut microbiota more similar to infants from a high-income setting.

89 We recently reported outcomes of a cluster-randomized trial of improved water,  
90 sanitation and hygiene (WASH) in rural Zimbabwe [19]. Among a subset of infants in  
91 whom anti-rotavirus IgA titres were measured, only 24% infants seroconverted  
92 following oral RVV administration. However, the WASH intervention significantly  
93 increased RVV seroconversion by 50% (19.6% in non-WASH arm versus 30.3% in  
94 the WASH arm) [20]. We hypothesised that the WASH intervention had reduced the  
95 burden of enteropathogens in these infants, thereby improving RVV immunogenicity.  
96 However, the WASH intervention had no effect on enteropathogen carriage [21] and  
97 enteropathogen burden was not associated with RVV immunogenicity [22]. In this  
98 follow-on study, we explore whether alterations in the composition of the gut  
99 microbiome are associated with RVV immunogenicity, by conducting whole  
100 metagenome shotgun sequencing of stool samples from infants around the time of  
101 RVV. Here we report on (i) the composition and function of the early-life gut  
102 microbiome in this rural LMIC setting and (ii) its association with RVV immunogenicity.

103

104

### 105 **MATERIALS AND METHODS**

106

#### 107 Study population

108 We present a sub-study of the Sanitation Hygiene Infant Nutrition Efficacy (SHINE)  
109 trial [19], a 2×2 factorial cluster-randomized trial assessing the independent and  
110 combined effects of improved WASH and improved infant and young child feeding

## The infant gut microbiome and rotavirus vaccine immunogenicity in rural Zimbabwean infants

111 (IYCF) on stunting and anaemia (NCT01824940). Briefly, 5280 pregnant women in  
112 rural Zimbabwe were enrolled and cluster-randomized to standard-of-care, IYCF,  
113 WASH or combined IYCF+WASH, and children were followed up until 18 months of  
114 age. 1169 HIV-unexposed children were enrolled in a sub-study of the SHINE trial  
115 which involved longitudinal specimen collection (including plasma and stool) at 1, 3,  
116 6, 12 and 18 months of age [23]. Sterile collection tubes were provided to mothers,  
117 who collected stool samples from their infants on the day of the study visit. Blood  
118 samples were collected from infants by trained nurses. Samples were transported by  
119 motorbike in cool boxes to field laboratories where they were aliquoted and stored at  
120 -80°C before subsequent transport to the central laboratory in Harare for ongoing  
121 storage. 158 infants with available plasma samples, oral rotavirus vaccine records and  
122 stool samples collected within 30 days of either vaccine dose were selected for  
123 analysis in this study. The SHINE trial was approved by the Medical Research Council  
124 of Zimbabwe and the Johns Hopkins Bloomberg School of Public Health Committee  
125 on Human Research. Written informed consent was obtained from all caregivers  
126 before enrolment in the trial.

127

### 128 Sub-study population

129 For this study, infants were selected if they had at least one plasma sample collected  
130 post-rotavirus vaccination and an available stool sample collected at either 1 or 3-  
131 months of age, as per previous analyses [22]. We permitted a 30-day window of stool  
132 collection pre- or post-vaccination (either RVV dose), hypothesizing that the gut  
133 microbiome soon before, during or after vaccination may contribute to RVV  
134 immunogenicity. In order to assess the effect of this chosen 30-day time-window

## The infant gut microbiome and rotavirus vaccine immunogenicity in rural Zimbabwean infants

135 around vaccination, we conducted two sensitivity analyses: first, employing a  
136 restricted time-window to include those collected prior to 43 days of age (median age  
137 of sample collection); and second, restricting to samples collected within 14-days pre  
138 or post-RVV. Infants were excluded if they did not have vaccination data recorded or  
139 had not received at least one dose of RVV. If more than one sample was available per  
140 child, the stool sample collected closest to the first dose of RVV was chosen for  
141 analysis. 158 participants meeting these criteria were included in this study. 67 of  
142 these participants had previously been selected and had metagenome sequencing  
143 data generated as part of a separate investigation into longitudinal infant microbiota  
144 maturation from the same cohort [24]. The remaining 91 samples were selected at  
145 random for the current study, whilst oversampling seroconverters to increase  
146 statistical power, and processed in an identical manner.

147

### 148 Rotavirus vaccination and anti-rotavirus Immunoglobulin A assay

149 Oral monovalent RVV (Rotarix™; GSK Biologicals) was introduced as part of the  
150 national vaccination programme in Zimbabwe in May 2014 and was administered to  
151 infants at 6 and 10 weeks of age. National vaccination coverage in 2015-2016 was  
152 87-91% [25]. Vaccination was undertaken at local clinics as part of routine national  
153 vaccination programmes and was not overseen by the SHINE trial team. Vaccination  
154 dates were recorded by SHINE study staff by reviewing child health cards. Plasma  
155 anti-rotavirus immunoglobulin A (IgA) was measured on stored plasma samples by  
156 enzyme-linked immunosorbent assay (ELISA) using methods previously described  
157 [26]. The primary outcome was RVV seroconversion, defined as a post-vaccine  
158 plasma concentration of anti-rotavirus IgA  $\geq 20$  U/mL in infants who were seronegative

## The infant gut microbiome and rotavirus vaccine immunogenicity in rural Zimbabwean infants

159 (<20 U/mL) pre-vaccination [27]. Secondary outcomes included anti-rotavirus IgA titre  
160 and RVV seropositivity, defined as a post-vaccine titre  $\geq 20$  U/mL, regardless of pre-  
161 vaccine titre. We refer to these outcomes collectively as RVV immunogenicity.

162

### 163 Stool metagenome sequencing

164 DNA was extracted from ~200mg stool using the Qiagen PowerSoil Kit with bead  
165 beating. DNA quality was confirmed by spectrophotometry (SimpliNano) and  
166 quantified by fluorometry (Qubit). 1 $\mu$ g DNA was used as an input for sequencing library  
167 preparation following the Illumina TruSeq PCR-free library preparation protocol, using  
168 custom end-repair, adenylation and ligation enzyme premixes. Constructed libraries  
169 were assessed for quality of concentration (qPCR) and size (Tapestation 2200) prior  
170 to pooling. 48 barcoded samples were pooled in each sequencing run. Positive  
171 controls (ZymoBIOMICS) and DNA-free negative controls were included through all  
172 steps including DNA extraction and library preparation. One negative control was  
173 included in each sequencing pool. Whole metagenome sequencing was performed  
174 with 125-nucleotide paired-end reads using either the Illumina HiSeq 2500 or HiSeqX  
175 platforms at Canada's Michael Smith Genome Sciences Centre, Vancouver, Canada.

176 *KneadData* was used with default settings to remove short reads (<60bp),  
177 duplicate reads, human and other non-microbial reads and to trim off adapters. Filtered  
178 sequencing reads were processed through the *MetaPhlan3* pipeline [28] with default  
179 settings to generate compositional data. *HUMAnN3* was used with default settings  
180 using the UniRef90 database to generate functional annotations (enzyme commission  
181 (EC) annotations and pathways) [29]. Compositional and functional data were filtered  
182 using a minimum threshold of >0.1% and >0.0001% relative abundance, respectively.

## The infant gut microbiome and rotavirus vaccine immunogenicity in rural Zimbabwean infants

183 Taxa were included in the analyses if present at a minimum threshold of 5%  
184 prevalence within the entire dataset.

185 A median of  $8.1 \pm 3.0$  million quality filtered reads were produced per sample.  
186 Sixteen negative controls were also sequenced with mean 734 quality-filtered reads  
187 (range = 149 to 11,432, SD = 3462). Following filtering of annotatable reads, 139  
188 species were included in the final analysis, of which 4 were classified as co-abundance  
189 gene groups metagenomic assemblies (CAGs) for which no culture-derived  
190 representative exists.

191

### 192 Statistical Analyses

193 All data were analysed using R (v.4.0.2). Beta-diversity was estimated using the Bray-  
194 Curtis dissimilarity index. Alpha diversity was assessed using the Shannon index and  
195 the number of observed species. Differential abundance analysis was performed by  
196 Wilcoxon rank sum test and Analysis of Composition of Microbiomes (ANCOM) [30].  
197 Random Forest machine learning models were performed using the *randomForest*  
198 package (SIAMCAT package [31]) in which five-fold cross-validation was performed  
199 with 100 iterations. Microbiome regression analyses were performed using the  
200 *MaAsLin2* package. Seven covariates were chosen for adjustment in regression  
201 models and included age at stool sample collection, birthweight, exclusive  
202 breastfeeding status (recorded at 3 months old), sex, WASH randomized trial arm,  
203 delivery mode and length-for-age Z-score (LAZ) around time of vaccination. These  
204 covariates were chosen based on biological plausibility and previous evidence of their  
205 independent influence on RVV immunogenicity in the same cohort [32]. Multiple



## The infant gut microbiome and rotavirus vaccine immunogenicity in rural Zimbabwean infants

206 comparisons were tested using Benjamini-Hochberg false discovery rate (FDR; q-  
207 value <0.05).

208

209

### 210 **RESULTS**

211

#### 212 Study cohort

213 Among 5280 women enrolled in the SHINE trial, there were 3989 live-born, HIV-  
214 unexposed infants. Of these, 882 children had RVV immunogenicity measured and  
215 158 of these had stool samples collected within 30 days of either vaccine dose and  
216 with valid metagenome sequencing data. **Table 1** outlines the primary characteristics  
217 of the 158 participants in this analysis. Of these 158 participants, 115 had  
218 seroconversion data available as a primary outcome (n=81 non-seroconverters, n=34  
219 seroconverters; **Figure 1a**), whilst secondary outcomes (seropositivity status and IgA  
220 titres) were available for all 158 infants (n=113 seronegative, n=45 seropositive).

221 The median age at first dose of RVV was 44 days [interquartile range (IQR):  
222 42-49]. The median age at stool sample collection was 43 days (IQR: 35-68; **Figure**  
223 **1b**). To test for and account for age-associated changes in microbiota composition,  
224 analyses were also split by early ( $\leq 42$  days) and late ( $> 42$  days) stool samples.

225

#### 226 Microbiome alpha and beta diversity associations with RVV immunogenicity

227 PERMANOVA analysis identified a small but significant difference in beta diversity as  
228 measured by Bray-Curtis distances by seroconversion status ( $P = 0.035$ ;  $R^2 = 0.014$ ;  
229 **Fig. 2a**), however this was largely explained by data dispersion (homogeneity of

## The infant gut microbiome and rotavirus vaccine immunogenicity in rural Zimbabwean infants

230 dispersion test;  $P = 0.035$ ). When split by median age of sample collection (43 days),  
231 there was a significant difference in Bray-Curtis distances between early and late  
232 samples ( $P < 0.001$ ;  $R^2 = 0.025$ ; **Fig. 2b**). Beta diversity analyses did not indicate a  
233 significant difference between samples collected immediately prior to or after the first  
234 dose of RVV in samples collected in the first 60 days of life (**Fig. S1a**), suggesting that  
235 there was no significant difference of the vaccine itself on gut microbiome beta  
236 diversity. No significant difference was observed between infants randomized to  
237 WASH or non-WASH trial arms (**Fig. S1b**).

238 In sensitivity analyses, when restricting to samples collected within 14 days of  
239 either vaccine dose ( $n=62$  non-seroconverters,  $n=28$  seroconverters), there was a  
240 significant difference in Bray-Curtis distances by seroconversion status ( $P = 0.011$ ;  $R^2$   
241  $= 0.022$ ; **Fig. S1 c**), which was partly explained by data dispersion ( $P = 0.03$ ).  
242 However, there was no significant difference in Bray-Curtis distances by  
243 seroconversion status when restricted to early samples ( $\leq 42$  days;  $n=79$  samples;  $P$   
244  $= 0.061$ ;  $R^2 = 0.024$ ). In analysis of secondary outcomes, beta diversity differed  
245 significantly by seropositivity status ( $P = 0.008$ ;  $R^2 = 0.012$ ; **Fig. S1 d**) in the total  
246 dataset, which was not explained by dispersion ( $P = 0.067$ ), but not when restricted to  
247 samples collected before  $\leq 42$  days ( $P = 0.113$ ;  $R^2 = 0.019$ ).

248 Alpha diversity, as measured by the Shannon index and number of observed  
249 species, did not significantly differ by seroconversion (Wilcoxon test:  $P = 0.369$  &  $P =$   
250  $0.260$  respectively; **Fig. 3a**) and was not associated with anti-rotavirus IgA titre in  
251 simple linear regression ( $P = 0.306$ ; **Fig. 3b**). As expected, there were significant  
252 differences in alpha diversity between early and late samples ( $P = 0.032$ ).

## The infant gut microbiome and rotavirus vaccine immunogenicity in rural Zimbabwean infants

253 In sensitivity analyses, alpha diversity also did not differ by seroconversion  
254 status or seropositivity status when restricted to early samples ( $P = 0.333$  and  $P =$   
255  $0.260$ , respectively) or when restricted to stool samples collected within 14 days of  
256 either RVV dose (data not shown). There was also no significant difference in alpha  
257 diversity by seropositivity status ( $P = 0.18$ ; **Fig. S2a-b**) or by randomized WASH arms  
258 (**Fig. S2c**).

259

### 260 Infant microbiome taxonomic composition and association with RVV immunogenicity

261 At the phylum level, samples were dominated by Actinobacteria (**Fig. 3c**).  
262 *Bifidobacterium longum* was the most abundant species in the entire dataset  
263 comprising a median 23% relative abundance, ranging from 0% to 97% across all  
264 samples. *Escherichia coli*, *Collinsella aerofaciens*, *B. bifidum* and *B.*  
265 *pseudocatenulanum* were the next most highly abundant across all datasets.  
266 Differential abundance analysis showed no significant differences in relative  
267 abundances of any taxa by seroconversion status (Wilcoxon ranked sum test,  $q >$   
268  $0.05$ ; **Fig. 3d**). This negative result was confirmed by the more stringent ANCOM  
269 model, which included covariate adjustment for age at stool sample collection,  
270 birthweight, exclusive breastfeeding status, sex, trial arm, delivery mode and LAZ  
271 around vaccination. Six species were significantly differentially abundant between  
272 early and late samples (Wilcoxon,  $q < 0.05$ : *B. longum*, *Streptococcus mitis*,  
273 *Bacteroides ovatus*, *Collinsella aerofaciens*, *Staphylococcus hominis*, *Streptococcus*  
274 *pneumoniae*; **Fig. 4a** and **S2e**) which was confirmed by ANCOM following covariate  
275 adjustment. In analysis of secondary outcomes, no taxa were significantly different by  
276 seropositivity status (**Fig. S2f**). In sensitivity analyses, when restricted to early

## The infant gut microbiome and rotavirus vaccine immunogenicity in rural Zimbabwean infants

277 samples or restricted to samples collected within 14 days of either vaccine dose, no  
278 taxa were significantly differentially abundant when compared by seroconversion or  
279 seropositivity statuses. *Collinsella aerofaciens* was the only species significantly  
280 different in relative abundance between WASH and non-WASH infants in this sub-  
281 cohort (**Fig. S2f**).

282 Random Forest models were also applied to the datasets to test whether  
283 microbiome features could predict seroconversion and age. Early and late samples  
284 were strongly classified by the Random Forest model (receiver operating curve area  
285 under the curve (AUC) 0.758; **Fig. 4b**). Random Forest regression of age produced  
286 moderately strong models ( $P = 0.001$ ;  $R^2 = 0.152$ ; 14% explained variation). However,  
287 random Forest poorly classified seroconversion status (AUC 0.589; **Fig. 4c**). In  
288 analysis of other secondary outcomes, random forest also poorly classified  
289 seropositivity (AUC 0.564; **Fig. S3a**) and WASH trial arm (AUC 0.5; **Fig. S3b**).

290 Regression models were built (MaAsLin2) to identify associations between gut  
291 microbial taxa and age or vaccine titres. Following FDR correction and adjustment for  
292 covariates, *Bacteroides thetaiotaomicron* was the only species significantly associated  
293 with IgA titre ( $P = 0.008$ ). This effect held in sensitivity analyses using samples  
294 collected within 14 days of either vaccine dose ( $P = 0.053$ ) whilst also indicating that  
295 *Slackia isoflavoniconvertens* was also associated with IgA titre in the restricted  
296 sensitivity dataset ( $P = 0.049$ ).

297

### 298 Infant microbiome functional composition and association with RVV immunogenicity

299 Metagenomic data were also analysed to assess microbiome functional pathways  
300 associated with age and RVV responses. Wilcoxon tests identified no functional

## The infant gut microbiome and rotavirus vaccine immunogenicity in rural Zimbabwean infants

301 pathway or EC that differed significantly by seroconversion status. Random Forest  
302 models of microbiome functional pathways also poorly classified seroconversion  
303 status. Two metagenomic pathways (*PWY-5994: palmitate biosynthesis I (animals*  
304 *and fungi* and *PWY-1042: glycolysis IV (plant cytosol)*) and 153 ECs were  
305 differentially abundant between early and late samples (**Fig. 5**). Random Forest  
306 models performed moderately well in classifying early and late samples based on  
307 metagenomic pathways (AUC 0.641; **Fig. S3c**). No EC or metagenomic pathway was  
308 significantly associated with IgA titre. In sensitivity analyses of early samples or those  
309 collected within 14 days of either vaccine dose, no EC or metagenomic pathway was  
310 associated with seroconversion and random forest classification was poor. No  
311 significant functional differences were observed by seropositivity status.

312

313

### 314 **DISCUSSION**

315 Here, we report on the stool metagenomes of 158 infants <6 months of age from a  
316 rural Zimbabwean birth cohort and their association with RVV immunogenicity. Similar  
317 to other low-income settings, RVV was poorly immunogenic in this cohort (24%  
318 seroconversion). The reasons for this are unclear, but dynamic changes in the  
319 microbiota at this age may influence mucosal immune responses to an oral vaccine.  
320 However, we demonstrate here that there is no distinct gut microbiome signature that  
321 distinguishes RVV seroconverters from non-seroconverters. Hence, poor vaccine  
322 seroconversion in this population does not appear to be explained by the gut  
323 microbiome.

## The infant gut microbiome and rotavirus vaccine immunogenicity in rural Zimbabwean infants

324 A handful of previous studies have demonstrated conflicting evidence for the  
325 association between the infant gut microbiome and oral RVV efficacy. A previous  
326 analysis of 170 infants in south India, using 16S amplicon sequencing, failed to find  
327 an association between the commensal infant gut microbiome and RVV  
328 seroconversion [16]. In the same study, however, RVV seroconverters were more  
329 likely to harbour at least one bacterial enteropathogen than non-seroconverters.  
330 Conversely, two separate studies in Ghana (n=20) [18] and Pakistan (n=78) [17],  
331 employing HITChip microarrays rather than next-generation sequencing, both  
332 demonstrated that the gut microbiome of RVV seroconverters differed significantly to  
333 non-seroconverters. Both of these studies also reported that the gut microbiome of  
334 seroconverters versus non-seroconverters were more similar to infants from a high-  
335 income setting in the Netherlands. However, the taxa associated with RVV  
336 seroconversion differed between countries. Higher relative abundances of Clostridium  
337 cluster XI and Proteobacteria were associated with seroconversion in Pakistan, whilst  
338 higher *Streptococcus bovis* and lower Bacteroidetes were associated with  
339 seroconversion in Ghana.

340 Due to the methodological differences in sequencing and the geographic  
341 differences in the cohorts, it is difficult to draw comparisons with these previous  
342 studies. Geographic setting has a major influence on gut microbiome composition and  
343 inter-individual variation between children across geographical settings is greater than  
344 in adults [33]. The results presented here, using gold-standard metagenome  
345 sequencing, failed to find a clear infant microbiome signature that distinguished RVV  
346 seroconverters from non-seroconverters. Previous evidence shows that the strongest  
347 contributor to infant gut microbiome composition in early-life is exclusivity of

## The infant gut microbiome and rotavirus vaccine immunogenicity in rural Zimbabwean infants

348 breastfeeding [34], which was extremely high in this cohort (>80%) due to study  
349 interventions designed to promote early and exclusive breastfeeding. Hence, any gut  
350 microbiome signatures associated with RVV seroconversion may be outweighed by  
351 the influence of breastfeeding and other exposures on the early-life microbiome.

352 We recently reported that enteropathogen carriage was not associated with  
353 RVV seroconversion in this cohort [22]. The results presented here extend these  
354 observations by showing that neither commensal nor pathogenic enteric microbes  
355 influenced RVV seroconversion. Oral RVV is taken up in the small intestine, whereas  
356 the gut microbiome and enteropathogen carriage measured in stool largely reflect the  
357 colonic intestinal environment. This may partly explain why we observed no  
358 association between the stool microbiota and RVV seroconversion in this cohort.  
359 Future studies examining the small intestinal microbiota may provide greater insight  
360 into the potential interaction between the commensal gut microbiome and oral  
361 vaccines. It remains unclear what biological factors contribute to poor RVV  
362 immunogenicity in low-income settings. Improved WASH enhanced RVV  
363 immunogenicity by 50% in this cohort [20], yet had no impact on enteropathogen  
364 carriage [21] or diarrhea [19]. In this subset of infants, WASH similarly had no  
365 significant impact on the early-life gut microbiome, suggesting that the effect of WASH  
366 on RVV immunogenicity is not driven through the gut microbiome. Hence, the causal  
367 pathway linking improved WASH with improved RVV seroconversion remains  
368 unexplained and complex.

369 This study benefited from a well-characterized cohort of infants from a large,  
370 community-based, cluster randomized trial. RVV seroconversion, measured in a  
371 subset of infants, was 23.7% rate despite high vaccine coverage, demonstrating its

## The infant gut microbiome and rotavirus vaccine immunogenicity in rural Zimbabwean infants

372 suitability as a representative infant population with low RVV immunogenicity. Within  
373 this subgroup, we have previously investigated and reported on a number of  
374 environmental factors associated with RVV seroconversion including enteropathogen  
375 carriage, WASH, household factors, birthweight and nutritional status [20, 22, 32].  
376 Hence the data presented here, albeit negative, add to the evidence base of RVV  
377 immunogenicity in a unique, well-characterised cohort by contributing unique insight  
378 into the intestinal milieu and its association with oral vaccine efficacy. We employed  
379 whole metagenome shotgun sequencing, which has not previously been extensively  
380 conducted in low-income settings, allowing us to examine both taxonomic and  
381 functional microbiome variables in relation to RVV seroconversion. It is also one of the  
382 very few high-resolution, metagenomic datasets from infants in a rural, non-  
383 industrialized setting.

384         The study is limited by its relatively small sample size, which is partly due to the  
385 low seroconversion rate in this population, the number of stool samples available for  
386 sequencing analysis and the criteria of sample selection within a 30-day time-window  
387 close to vaccination. This arbitrary time-window was based on the hypothesis that the  
388 intestinal environment around the time of vaccination may alter vaccine efficacy and  
389 was chosen to complement our previous analyses in this same cohort using the same  
390 cut-off around vaccination [22]. The study is limited by this chosen time-window which  
391 may lead to confounding effects of age on any potential gut microbiome associations.  
392 To mitigate this, we adjusted for age in all regression models and also performed  
393 sensitivity analyses using a restricted 14-day time window and analysing a subset of  
394 'early' samples collected before 43 days of age (median age of sample set). Secondly,  
395 the outcomes assessed in this study (seroconversion and seropositivity) may not be



## The infant gut microbiome and rotavirus vaccine immunogenicity in rural Zimbabwean infants

396 accurate correlates of vaccine protection. We focussed on seroconversion as a  
397 primary outcome as this depends on both pre and post-vaccine titres and also included  
398 seropositivity as a secondary analysis. However, as we and others have reported [32],  
399 natural rotavirus infection prior to vaccination may confound IgA titres which limits both  
400 seroconversion and seropositivity in particular as an outcome. Furthermore,  
401 seroconversion and seropositivity are not perfect correlates of protection against  
402 rotavirus protection [35]. Thirdly, due to the difficulties in obtaining viral reads from  
403 stool metagenomic data, we were unable to determine the impact of enteroviruses on  
404 RVV seroconversion, which has been hypothesized previously to be associated with  
405 RVV immunogenicity [16]. Specific analysis of the infant virome may shed more light  
406 on RVV underperformance.

407 In conclusion, we found no clear stool microbiome signature associated with  
408 oral RVV immunogenicity in rural Zimbabwean infants. Further research into other  
409 intestinal and additional biological pathways that explain poor oral vaccine  
410 immunogenicity in low-resource settings is warranted.

411

### 412 **FUNDING**

413 This work was supported by the Wellcome Trust [203905/Z/16/Z to JAC,  
414 206455/Z/17/Z to RCR and 093768/Z/10/Z and 108065/Z/15/Z to AJP]. The SHINE  
415 trial was funded by the Bill and Melinda Gates Foundation [OPP1021542 and  
416 OPP113707]; UK Department for International Development (UK Aid); Swiss Agency  
417 for Development and Cooperation and US National Institutes of Health  
418 [2R01HD060338-06]. The study funders approved the trial design, but were not  
419 involved in data collection, analysis, interpretation, or manuscript preparation.

420

421 **CONFLICT OF INTEREST**

422 The authors declare no conflicts of interest

423

424

425 **ACKNOWLEDGEMENTS**

426 The authors thank all the mothers, babies and their families who participated in THE  
427 SHINE trial. The authors gratefully acknowledge the leadership and staff of the  
428 Ministry of Health and Child Care in Chirumanzu and Shurugwi districts and Midlands  
429 Province (especially environmental health, nursing and nutrition) for their roles in  
430 operationalization of the study procedures. The authors acknowledge the Ministry of  
431 Local Government officials in each district who supported and facilitated field  
432 operations. The authors also acknowledge Monica M. McNeal for her invaluable  
433 support in setting up the anti-rotavirus IgA assay.

434

435

436 **All authors attest they meet the ICMJE criteria for authorship.**

# The infant gut microbiome and rotavirus vaccine immunogenicity in rural Zimbabwean infants

## REFERENCES

1. Collaborators GDD. Estimates of the global, regional, and national morbidity, mortality, and aetiologies of diarrhoea in 195 countries: a systematic analysis for the Global Burden of Disease Study 2016. *Lancet Infect Dis* **2018**; 18(11): 1211-28.
2. Patel M, Shane AL, Parashar UD, Jiang B, Gentsch JR, Glass RI. Oral rotavirus vaccines: how well will they work where they are needed most? *J Infect Dis* **2009**; 200 Suppl 1: S39-48.
3. Ruiz-Palacios GM, Pérez-Schael I, Velázquez FR, et al. Safety and efficacy of an attenuated vaccine against severe rotavirus gastroenteritis. *N Engl J Med* **2006**; 354(1): 11-22.
4. Vesikari T, Matson DO, Dennehy P, et al. Safety and efficacy of a pentavalent human-bovine (WC3) reassortant rotavirus vaccine. *N Engl J Med* **2006**; 354(1): 23-33.
5. Zaman K, Dang DA, Victor JC, et al. Efficacy of pentavalent rotavirus vaccine against severe rotavirus gastroenteritis in infants in developing countries in Asia: a randomised, double-blind, placebo-controlled trial. *Lancet* **2010**; 376(9741): 615-23.
6. Armah GE, Sow SO, Breiman RF, et al. Efficacy of pentavalent rotavirus vaccine against severe rotavirus gastroenteritis in infants in developing countries in sub-Saharan Africa: a randomised, double-blind, placebo-controlled trial. *Lancet* **2010**; 376(9741): 606-14.
7. Kotloff KL, Nataro JP, Blackwelder WC, et al. Burden and aetiology of diarrhoeal disease in infants and young children in developing countries (the Global Enteric Multicenter Study, GEMS): a prospective, case-control study. *Lancet* **2013**; 382(9888): 209-22.
8. Parker EP, Ramani S, Lopman BA, et al. Causes of impaired oral vaccine efficacy in developing countries. *Future Microbiol* **2018**; 13: 97-118.

## The infant gut microbiome and rotavirus vaccine immunogenicity in rural Zimbabwean infants

9. Church JA, Parker EP, Kirkpatrick BD, Grassly NC, Prendergast AJ. Interventions to improve oral vaccine performance: a systematic review and meta-analysis. *Lancet Infect Dis* **2019**; 19(2): 203-14.
10. Robertson RC, Manges AR, Finlay BB, Prendergast AJ. The Human Microbiome and Child Growth - First 1000 Days and Beyond. *Trends Microbiol* **2019**; 27(2): 131-47.
11. Uchiyama R, Chassaing B, Zhang B, Gewirtz AT. Antibiotic treatment suppresses rotavirus infection and enhances specific humoral immunity. *J Infect Dis* **2014**; 210(2): 171-82.
12. Shi Z, Zou J, Zhang Z, et al. Segmented Filamentous Bacteria Prevent and Cure Rotavirus Infection. *Cell* **2019**; 179(3): 644-58.e13.
13. de Jong SE, Olin A, Pulendran B. The Impact of the Microbiome on Immunity to Vaccination in Humans. *Cell Host Microbe* **2020**; 28(2): 169-79.
14. Lynn MA, Tumes DJ, Choo JM, et al. Early-Life Antibiotic-Driven Dysbiosis Leads to Dysregulated Vaccine Immune Responses in Mice. *Cell Host Microbe* **2018**; 23(5): 653-60.e5.
15. Harris VC, Haak BW, Handley SA, et al. Effect of Antibiotic-Mediated Microbiome Modulation on Rotavirus Vaccine Immunogenicity: A Human, Randomized-Control Proof-of-Concept Trial. *Cell Host Microbe* **2018**; 24(2): 197-207.e4.
16. Parker EPK, Praharaj I, Zekavati A, et al. Influence of the intestinal microbiota on the immunogenicity of oral rotavirus vaccine given to infants in south India. *Vaccine* **2018**; 36(2): 264-72.
17. Harris V, Ali A, Fuentes S, et al. Rotavirus vaccine response correlates with the infant gut microbiota composition in Pakistan. *Gut Microbes* **2018**; 9(2): 93-101.

## The infant gut microbiome and rotavirus vaccine immunogenicity in rural Zimbabwean infants

18. Harris VC, Armah G, Fuentes S, et al. Significant Correlation Between the Infant Gut Microbiome and Rotavirus Vaccine Response in Rural Ghana. *J Infect Dis* **2017**; 215(1): 34-41.
19. Humphrey JH, Mbuya MNN, Ntozini R, et al. Independent and combined effects of improved water, sanitation, and hygiene, and improved complementary feeding, on child stunting and anaemia in rural Zimbabwe: a cluster-randomised trial. *Lancet Glob Health* **2019**; 7(1): e132-e47.
20. Church JA, Rukobo S, Govha M, et al. The impact of improved water, sanitation and hygiene on oral rotavirus vaccine immunogenicity in Zimbabwean infants: sub-study of a cluster-randomized trial. *Clin Infect Dis* **2019**.
21. Rogawski McQuade ET, Platts-Mills JA, Gratz J, et al. Impact of Water Quality, Sanitation, Handwashing, and Nutritional Interventions on Enteric Infections in Rural Zimbabwe: The Sanitation Hygiene Infant Nutrition Efficacy (SHINE) Trial. *J Infect Dis* **2020**; 221(8): 1379-86.
22. Church JA, Rogawski McQuade ET, Mutasa K, et al. Enteropathogens and Rotavirus Vaccine Immunogenicity in a Cluster Randomized Trial of Improved Water, Sanitation and Hygiene in Rural Zimbabwe. *Pediatr Infect Dis J* **2019**; 38(12): 1242-8.
23. Prendergast AJ, Humphrey JH, Mutasa K, et al. Assessment of Environmental Enteric Dysfunction in the SHINE Trial: Methods and Challenges. *Clin Infect Dis* **2015**; 61 Suppl 7: S726-32.
24. Gough EK, Prendergast AJ, Mutasa KE, Stoltzfus RJ, Manges AR, Team SHINEST. Assessing the Intestinal Microbiota in the SHINE Trial. *Clin Infect Dis* **2015**; 61 Suppl 7: S738-44.
25. UNICEF. Zimbabwe: WHO and UNICEF estimates of immunization coverage: 2016 revision. . **2016**.

## The infant gut microbiome and rotavirus vaccine immunogenicity in rural Zimbabwean infants

26. Bernstein DI, Smith VE, Sherwood JR, et al. Safety and immunogenicity of live, attenuated human rotavirus vaccine 89-12. *Vaccine* **1998**; 16(4): 381-7.
27. Ward RL, Bernstein DI, Shukla R, et al. Effects of antibody to rotavirus on protection of adults challenged with a human rotavirus. *J Infect Dis* **1989**; 159(1): 79-88.
28. Truong DT, Franzosa EA, Tickle TL, et al. MetaPhlan2 for enhanced metagenomic taxonomic profiling. *Nat Methods* **2015**; 12(10): 902-3.
29. Franzosa EA, McIver LJ, Rahnavard G, et al. Species-level functional profiling of metagenomes and metatranscriptomes. *Nat Methods* **2018**; 15(11): 962-8.
30. Mandal S, Van Treuren W, White RA, Eggesbø M, Knight R, Peddada SD. Analysis of composition of microbiomes: a novel method for studying microbial composition. *Microb Ecol Health Dis* **2015**; 26: 27663.
31. Wirbel J, Zych K, Essex M, et al. SIAMCAT: user-friendly and versatile machine learning workflows for statistically rigorous microbiome analyses. *bioRxiv* **2020**.
32. Church JA, Chasekwa B, Rukobo S, et al. Predictors of oral rotavirus vaccine immunogenicity in rural Zimbabwean infants. *Vaccine* **2020**; 38(13): 2870-8.
33. Yatsunenkov T, Rey FE, Manary MJ, et al. Human gut microbiome viewed across age and geography. *Nature* **2012**; 486(7402): 222-7.
34. Stewart CJ, Ajami NJ, O'Brien JL, et al. Temporal development of the gut microbiome in early childhood from the TEDDY study. *Nature* **2018**; 562(7728): 583-8.
35. Clarke E, Desselberger U. Correlates of protection against human rotavirus disease and the factors influencing protection in low-income settings. *Mucosal Immunol* **2015**; 8(1): 1-17.

## FIGURE LEGENDS

**Fig 1. Study flow.** (a) Flow diagram of stool samples included in the analysis originating from the SHINE trial. (b) Timing of stool samples included in the analysis and associated RVV doses.

**Fig. 2. Beta diversity analysis by seroconversion status and early vs late samples.** Principal coordinates analysis (PCoA) and associated Bray-Curtis distances to assess beta diversity of seroconversion status (a) and early vs late samples (b) as assessed using PERMANOVA analysis.

**Fig. 3. Alpha diversity and taxonomic composition.** (a) Alpha diversity, as assessed using the Shannon index and number of observed species, between seroconverters and non-seroconverters. (b) Associations between alpha diversity, age at stool sample collection and RV IgA titre. (c) Phylum composition of entire dataset. (d) Species composition in seroconverters vs non-seroconverters.

**Fig. 4. Differential abundance analysis and machine learning models of taxonomic composition.** (a) Species that differ significantly in relative abundance between early ( $\leq 42$  days) and late ( $> 42$  days) samples as assessed by Wilcoxon ranked sum test ( $q$  value  $< 0.05$ ). Random Forest machine learning classification model of (a) early vs late samples and (b) seroconverters vs non-seroconverters using all microbiome species.

The infant gut microbiome and rotavirus vaccine immunogenicity in rural  
Zimbabwean infants

**Fig. 5. Functional metagenomic analysis.** Enzyme commission annotations that differ significantly in relative abundance between early vs late samples (Wilcoxon rank sum test;  $q$  value  $< 0.05$ ; top 20 ECs shows as ranked by  $q$ -value).



The infant gut microbiome and rotavirus vaccine immunogenicity in rural Zimbabwean infants

Table 1.

|                                       | Seroconversion     |                |         | Seropositivity |              |         |
|---------------------------------------|--------------------|----------------|---------|----------------|--------------|---------|
|                                       | Non-seroconverters | Seroconverters | P value | Seronegative   | Seropositive | P value |
|                                       | N=81               | N=34           |         | N=113          | N=45         |         |
| Female, %                             | 61.7               | 55.9           |         | 59.3           | 48.9         |         |
| Birthweight, kg (sd)                  | 3.17 (0.48)        | 3.06 (0.55)    | 0.303   | 3.11 (0.49)    | 3.06 (0.50)  | 0.564   |
| Low birthweight, %                    | 4.94               | 11.8           |         | 7.96           | 8.89         |         |
| Vaginal delivery, %                   | 96.3               | 97.1           |         | 95.6           | 95.6         |         |
| Institutional delivery, %             | 91.2               | 94.1           |         | 93.8           | 95.6         |         |
| Exclusively breastfed (at month 3), % | 90.0               | 97.1           |         | 90.1           | 95.5         |         |
| Concurrent OPV vaccination, %         | 95.7               | 93.8           |         | 96.5           | 92.1         |         |
| Age at stool sample, days [IQR]       | 38 [34; 66]        | 37 [33; 41]    | 0.222   | 45 [35; 78]    | 38 [34; 59]  | 0.034   |
| Age at first RV dose, days [IQR]      | 46 [43; 54]        | 44 [42;45]     | 0.002   | 45 [42; 50]    | 44 [42; 45]  | 0.019   |
| Age at second RV dose, days [IQR]     | 82 [74; 100]       | 77 [75;82]     | 0.037   | 78 [72; 93]    | 77 [75; 83]  | 0.669   |
| LAZ at 1 month visit (sd)             | -0.88 (1.09)       | -0.80 (1.43)   | 0.783   | -1.00 (1.19)   | -0.73 (1.33) | 0.267   |
| LAZ at 3 month visit (sd)             | -0.90 (1.07)       | -0.84 (1.19)   | 0.786   | -0.94 (1.13)   | -0.88 (1.25) | 0.791   |
| WASH trial arm, %                     | 42.0               | 47.1           |         | 41.6           | 51.1         |         |
| Born in RV season, %                  | 33.3               | 44.1           |         | 29.2           | 37.8         |         |
| Household size                        | 5 [4; 6]           | 5 [4; 6]       | 0.126   | 5 [4; 6]       | 5 [4; 6]     | 0.298   |
| Mother age at baseline, years (sd)    | 27.9 (5.8)         | 27.3 (6.1)     | 0.659   | 27.6 (6.0)     | 27.2 (6.5)   | 0.787   |
| Mother height at baseline, cm (sd)    | 160.7 (6.2)        | 160.7 (6.0)    | 0.983   | 160 (5.9)      | 161 (6.2)    | 0.722   |

**a**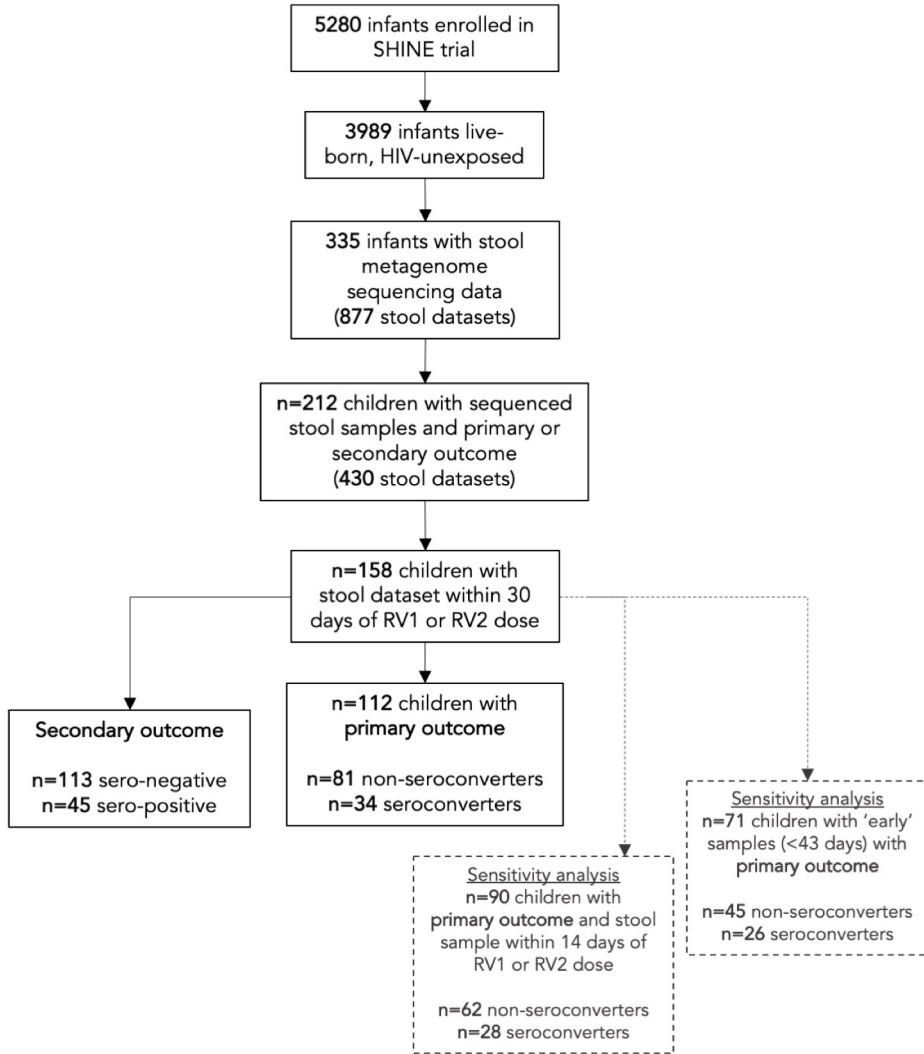**b**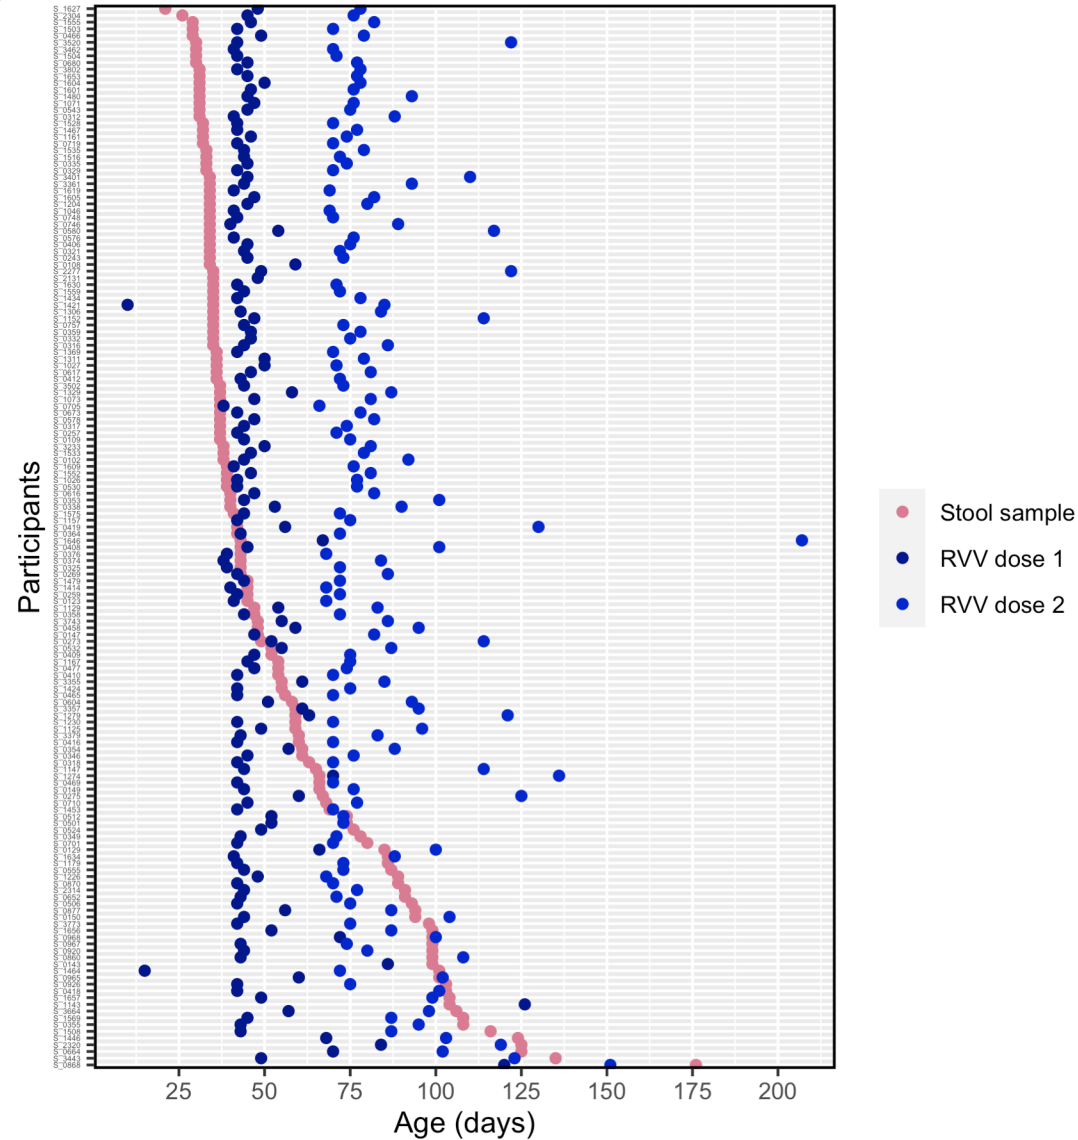

**a**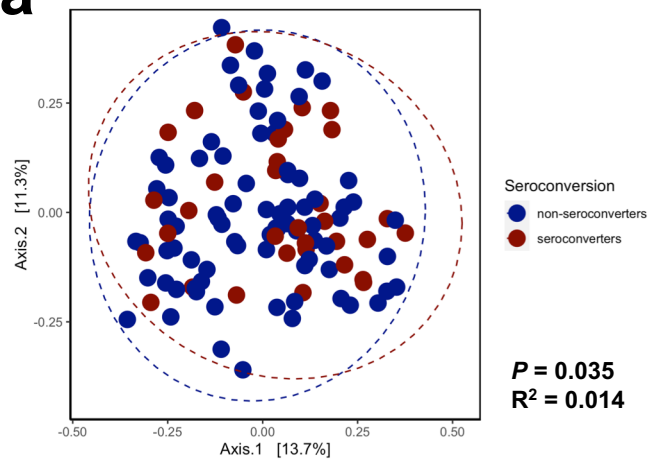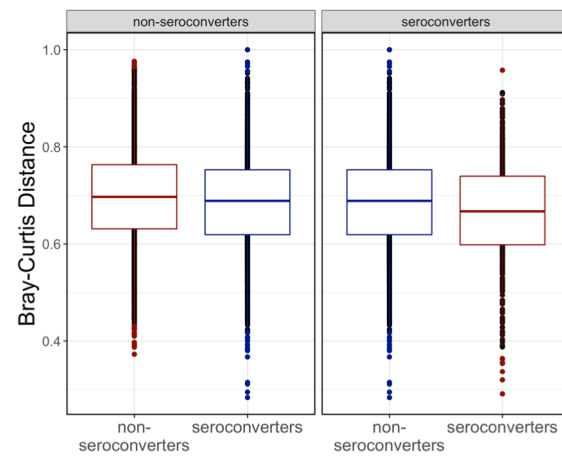**b**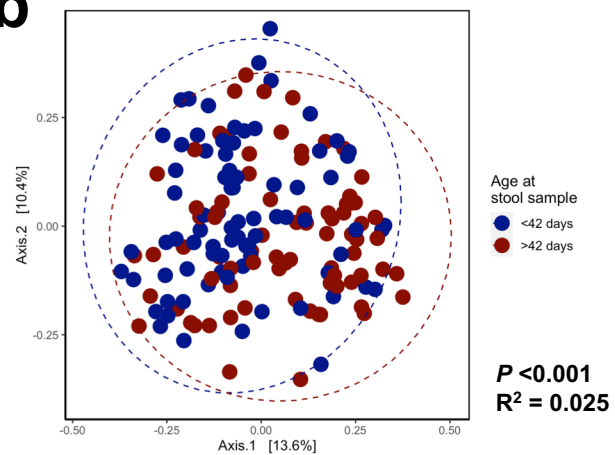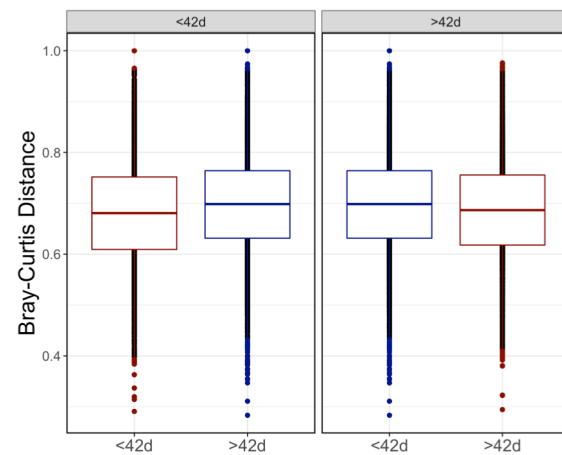

**a**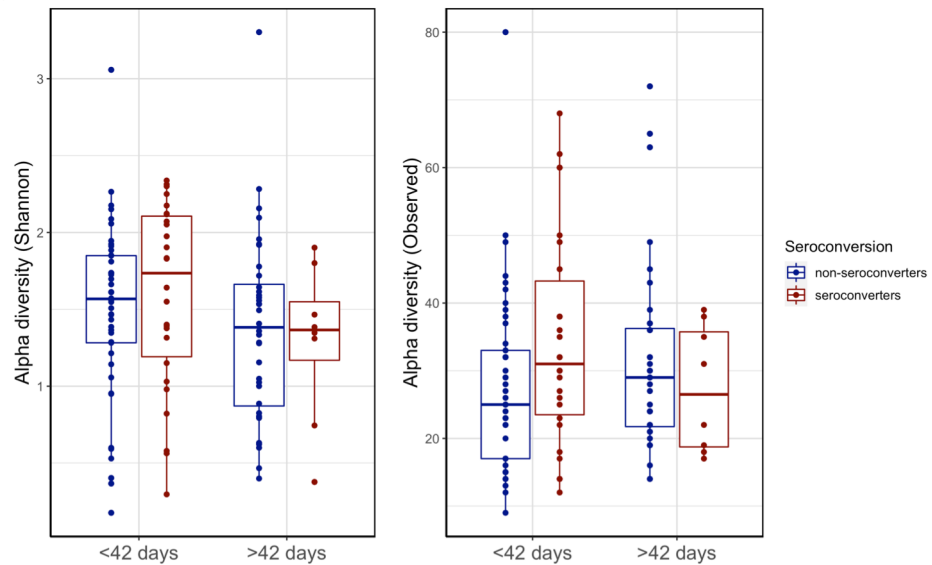**b**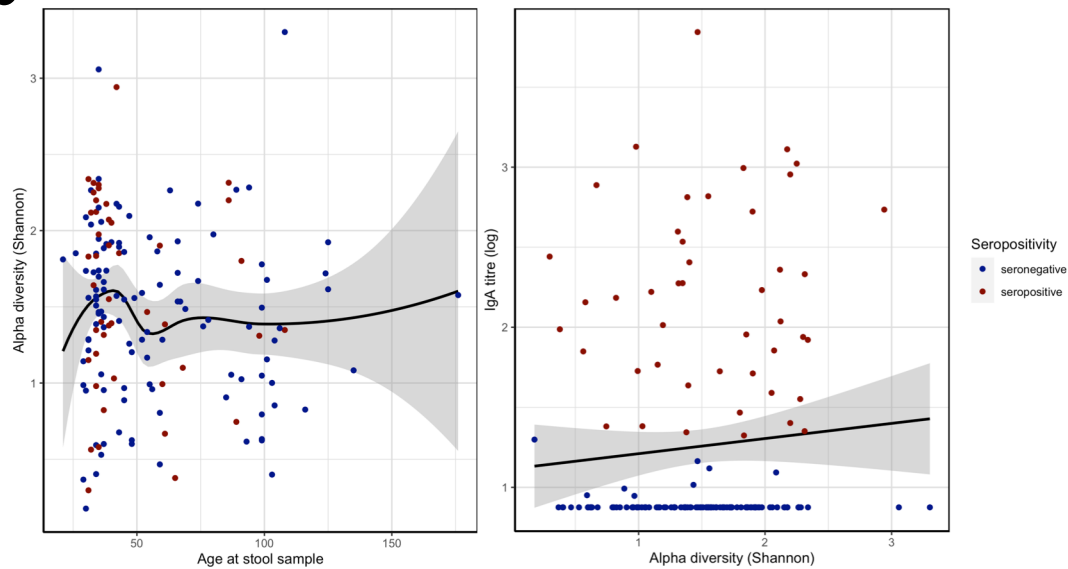**c**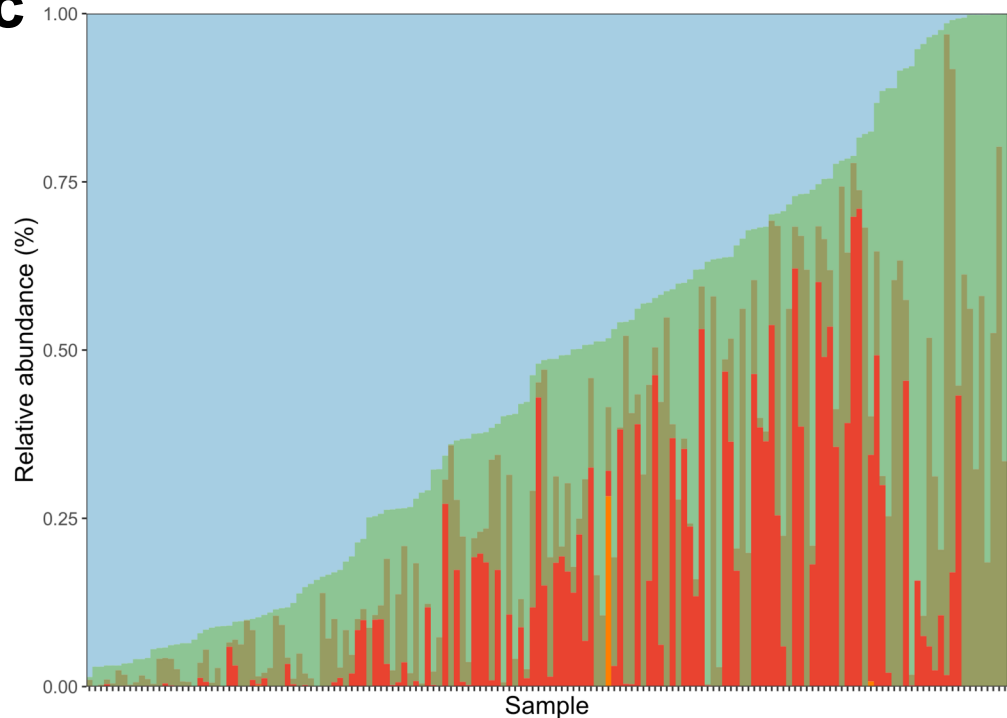**d**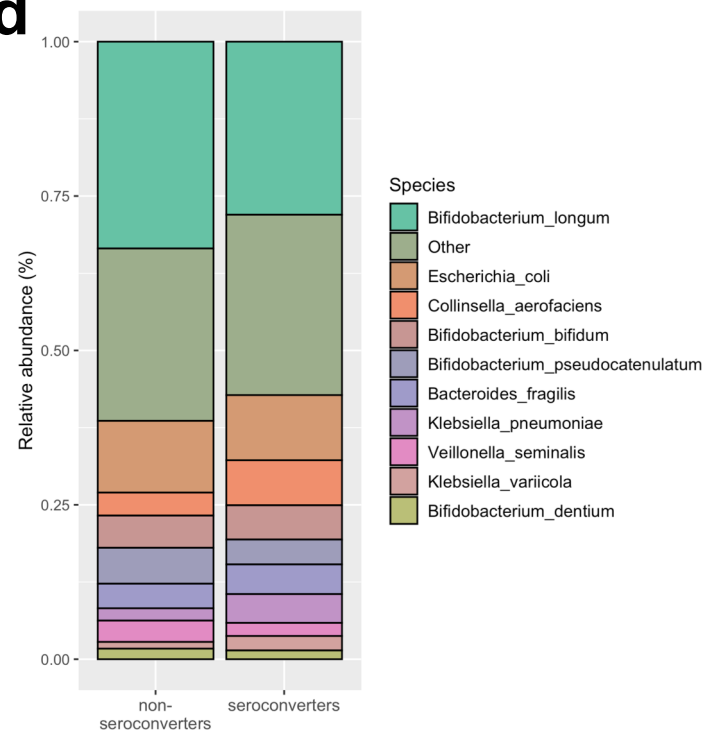

**a**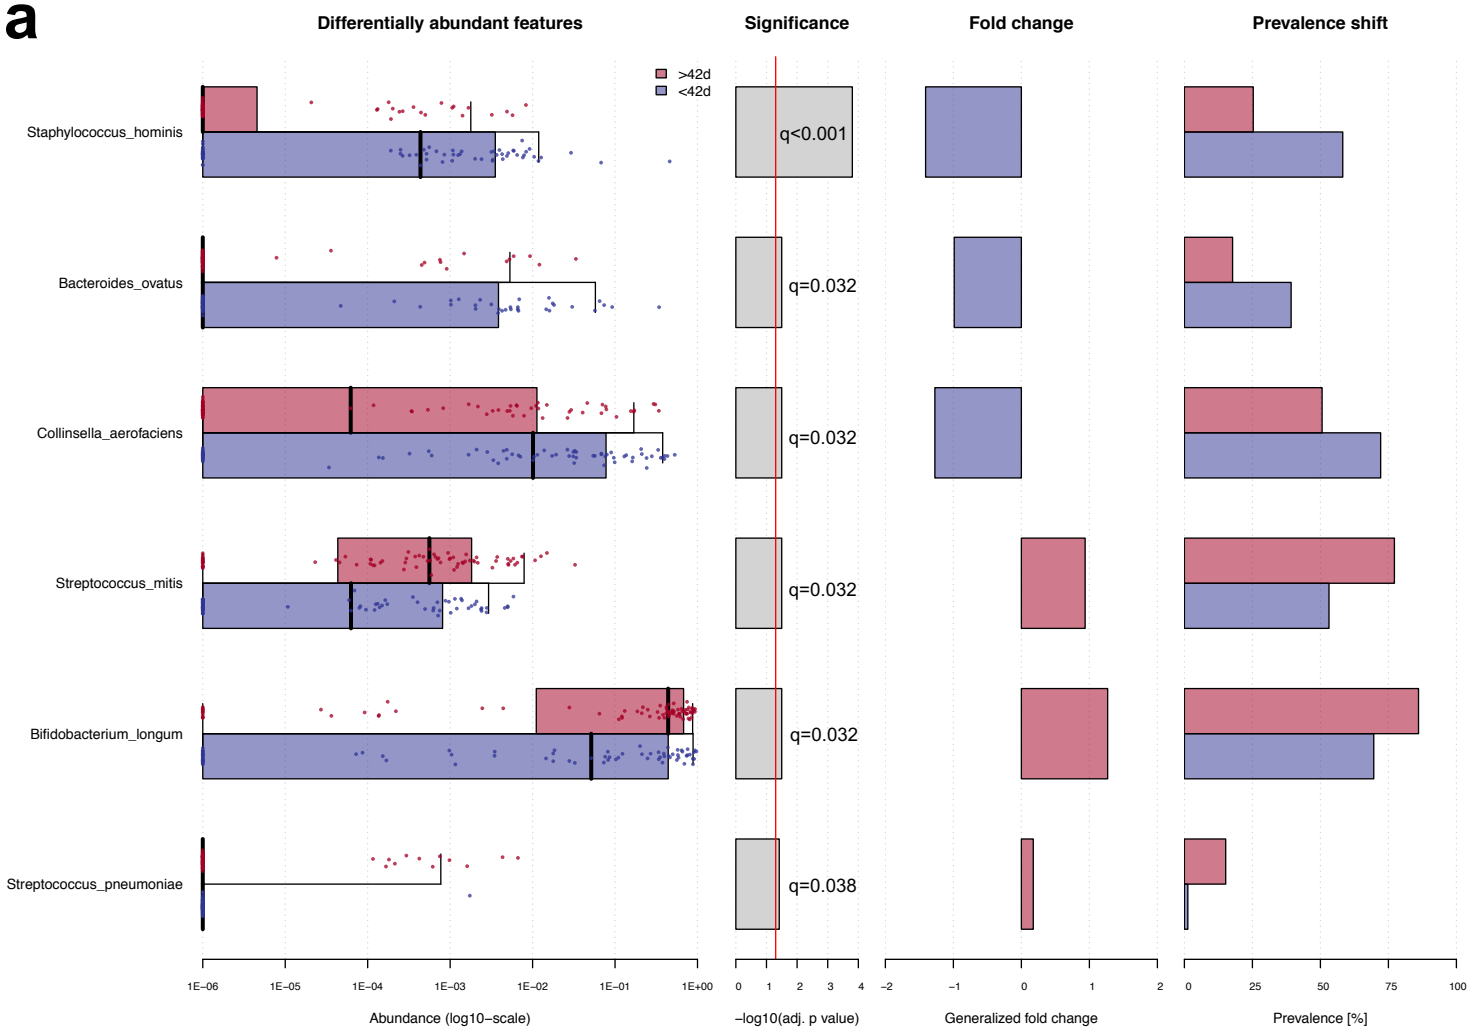**b**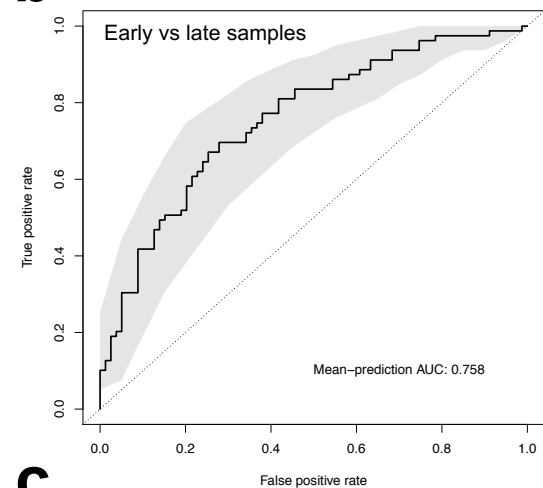**c**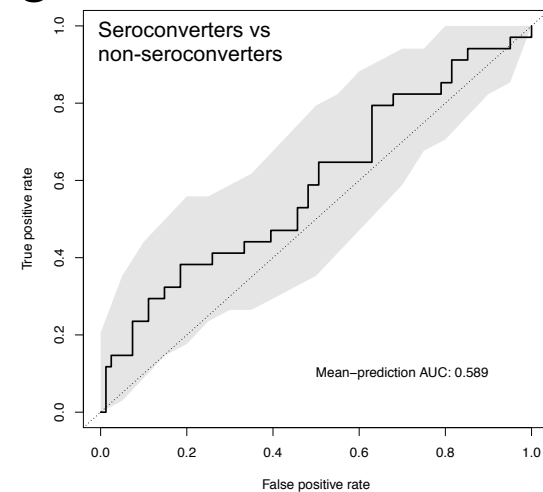

# Differentially abundant features showing top 20 features

## Significance

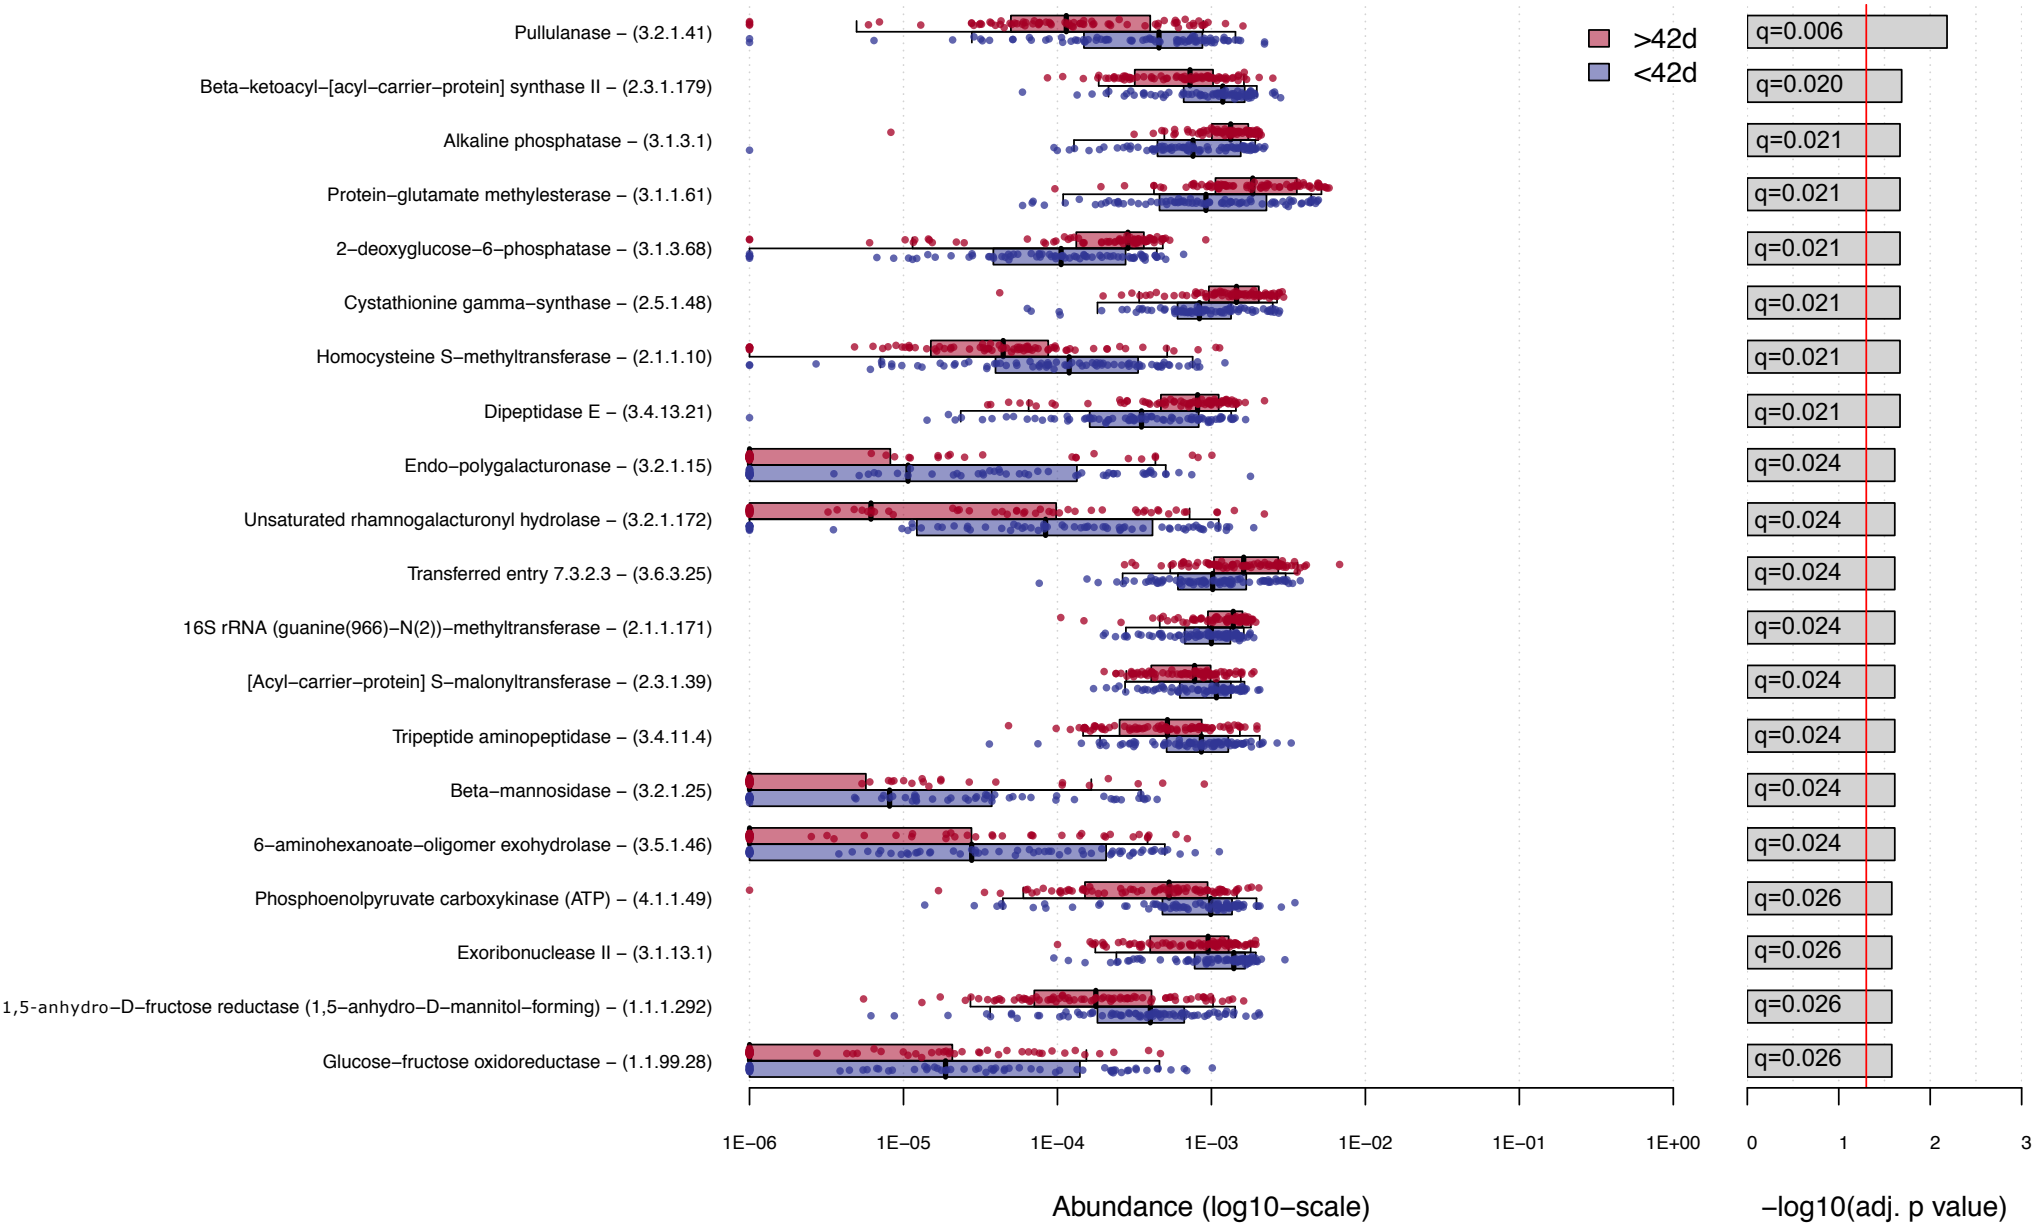

Source: http://medrxiv.org/content/10.1101/2021.03.24.21254180v1.full.pdf
